# Supplementary material
Source: PubMed Central journal article supplement (PMC2174195)

1 **Supplemental Material:**

2

3 **Production of polyclonal Antibody (pAb) against Tap.** Tap residues 522-619 were  
4 digested from FLAG-Tap WT vector using NheI and EcoRI and inserted into the NheI  
5 and EcoRI site of the bacterial expression vector pET23b. Digestion of the pET23b  
6 vector with NheI and EcoRI also removed the T7 tag. Tap 522-619 was expressed in *E.*  
7 *coli* and induced with IPTG. The bacterial pellet was solubilized in TNE (50 mM Tris  
8 pH 8, 50 mM NaCl, 1 mM EDTA) and Tap 522-619 enriched through sequential  
9 ammonium sulfate precipitation steps. Significant enrichment of the Tap protein was  
10 recovered from 15%-35% ammonium sulfate pellet (Figure S1) and used to immunize two  
11 New-Zealand White rabbits (Cocalico Biologicals, Inc., Reamstown, PA).

12

13 **Specificity of Tap pAb.** Extract from COS-7 cells untransfected or transfected with  
14 FLAG-Tap WT construct were separated by SDS-PAGE and transferred to Immobilon-P  
15 membrane. Blots were blocked in 5% milk and incubated with immune serum overnight.  
16 Some of the serum was preadsorbed with recombinant Tap 522-619 protein (5 ug/ $\mu$ L of  
17 serum) for 3 hours prior to incubation with the blot (Figure S2). The serum detected  
18 endogenous Tap in both transfected (lane 2) and untransfected cells (lane 1). Expression  
19 of FLAG-Tap was also observed in transfected cell extract. Preadsorption of the serum  
20 with antigen prior to WB eliminated the reactivity (Figure S2, lanes 3 and 4).

21

22

23 **Supplemental Figure 1:** Recombinant Tap 522-619 protein used for pAb production.  
24 Recombinant Tap 522-619 was enriched from bacterial extract by sequential ammonium  
25 sulfate precipitation steps. Aliquots of the enriched Tap 522-619 fraction containing 1  $\mu$ g  
26 or 5  $\mu$ g of proteins were resolved on SDS-PAGE and visualized by Coomassie R250.

27

28 **Supplemental Figure 2:** Characterization of the Tap pAb by WB. Extract from  
29 untransfected COS-7 or COS-7 cells expressing FLAG-Tap were resolved by SDS-PAGE  
30 and transferred to Immobilon-P membrane. Membrane was incubated with either serum

- 1 derived from a rabbit immunized with Tap 522-619 protein or the same serum pre-
- 2 incubated with antigen. Proteins were visualized by standard WB protocol.
- 3
- 4

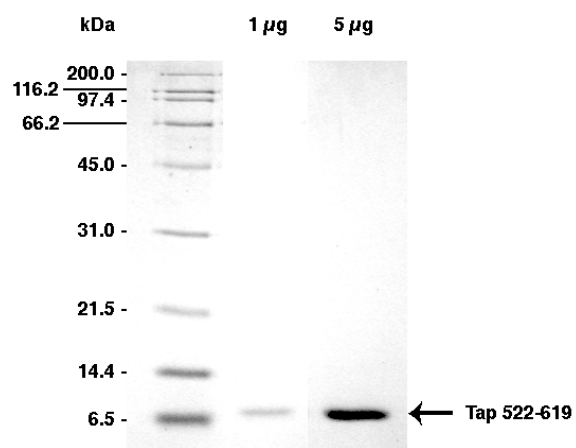

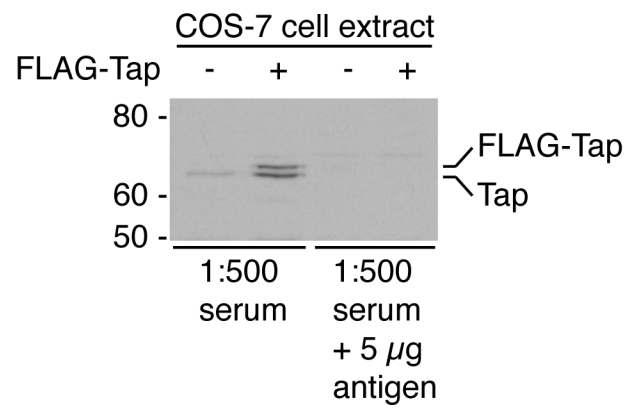

Supplement: mbc_E07-03-0255_1.pdf [file mbc_E07-03-0255_1.pdf]
